# Supplementary material for: Defective homologous recombination DNA repair as therapeutic target in advanced chordoma
Source: PubMed Central journal article supplement (PMC6456501; doi:10.1038/s41467-019-09633-9), 2019-04-09
Supplement: 41467_2019_9633_MOESM1_ESM.pdf [file 41467_2019_9633_MOESM1_ESM.pdf]

## **Supplementary Information**

Defective homologous recombination DNA repair as therapeutic target in advanced chordoma

Gröschel, Hübschmann et al.

# Supplementary Figures

## Chord\_01

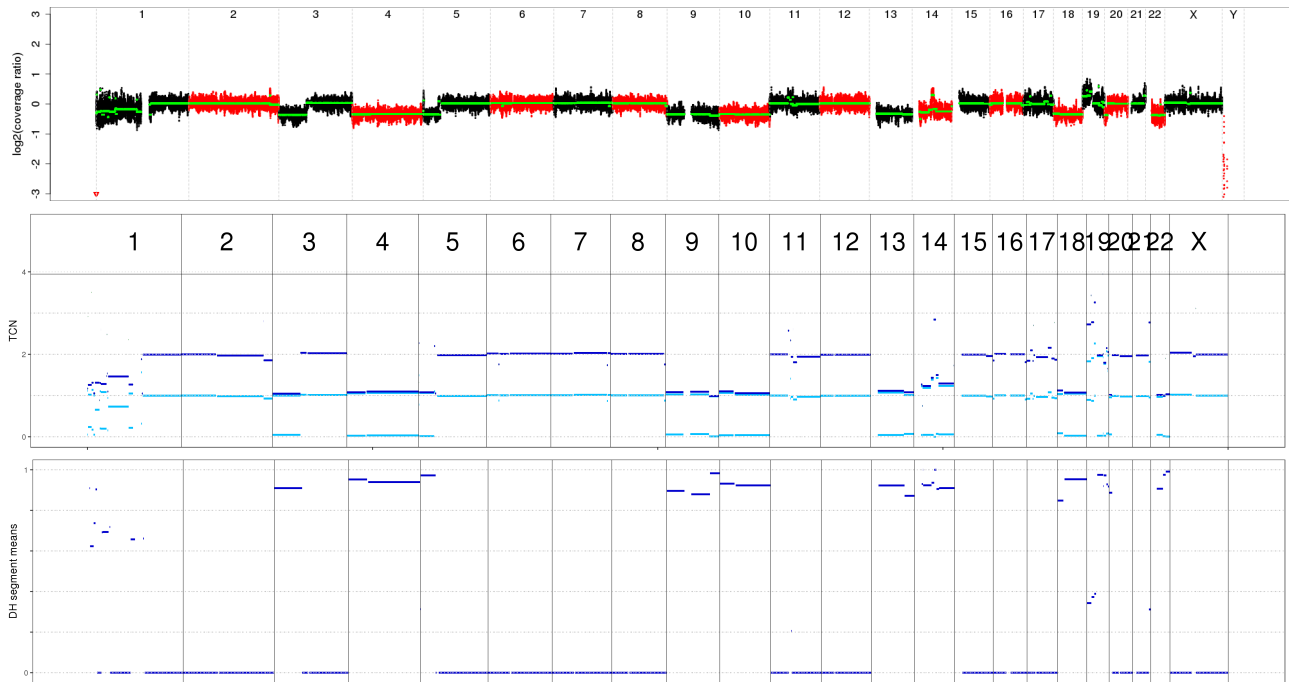

## Chord\_02

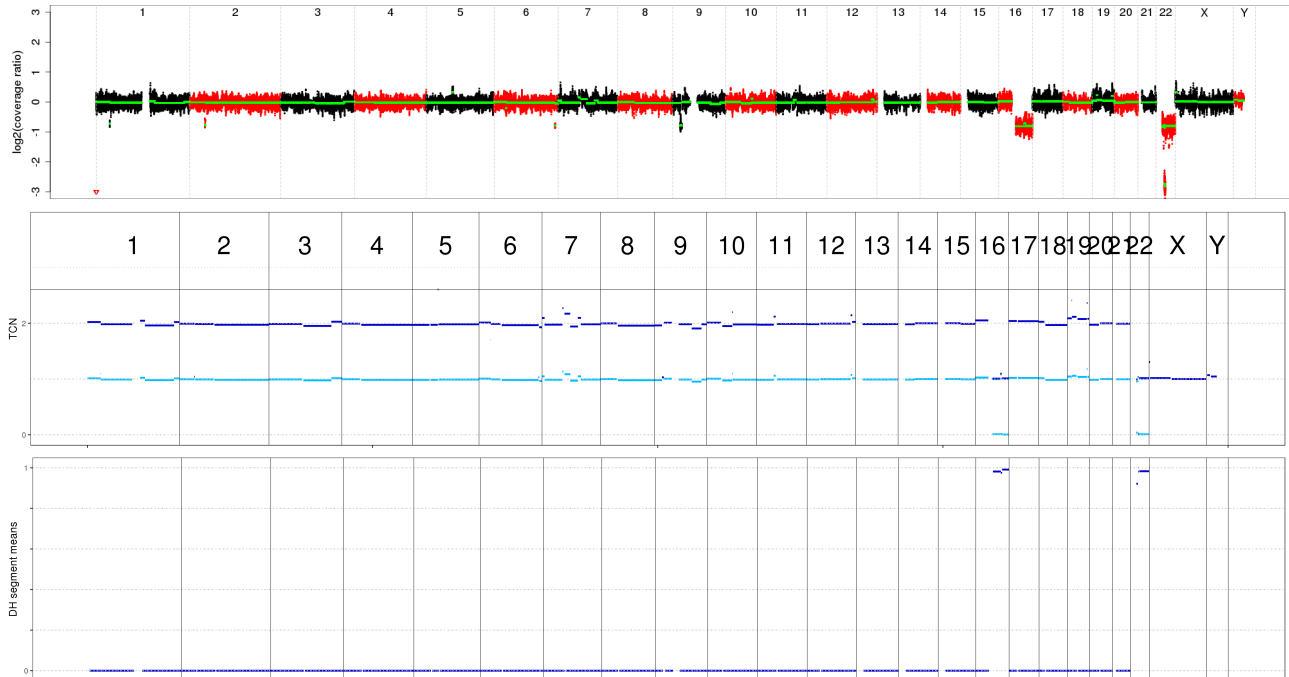

### Chord\_03

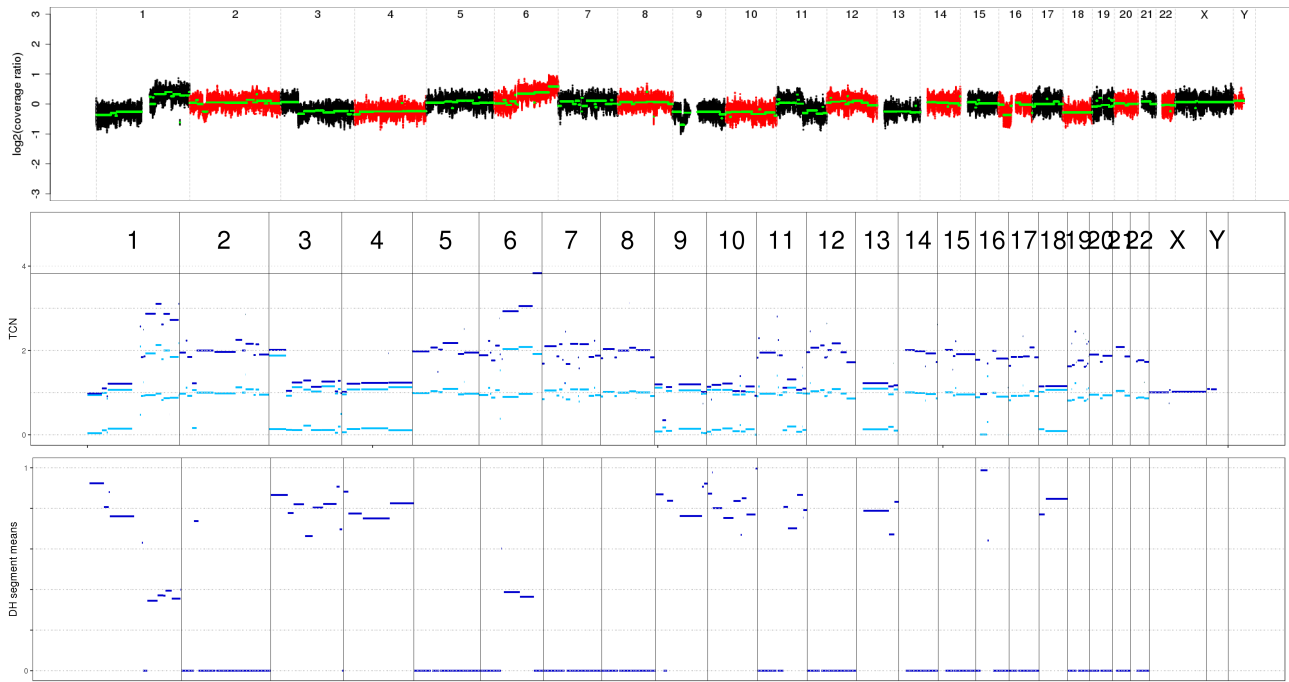

### Chord\_04

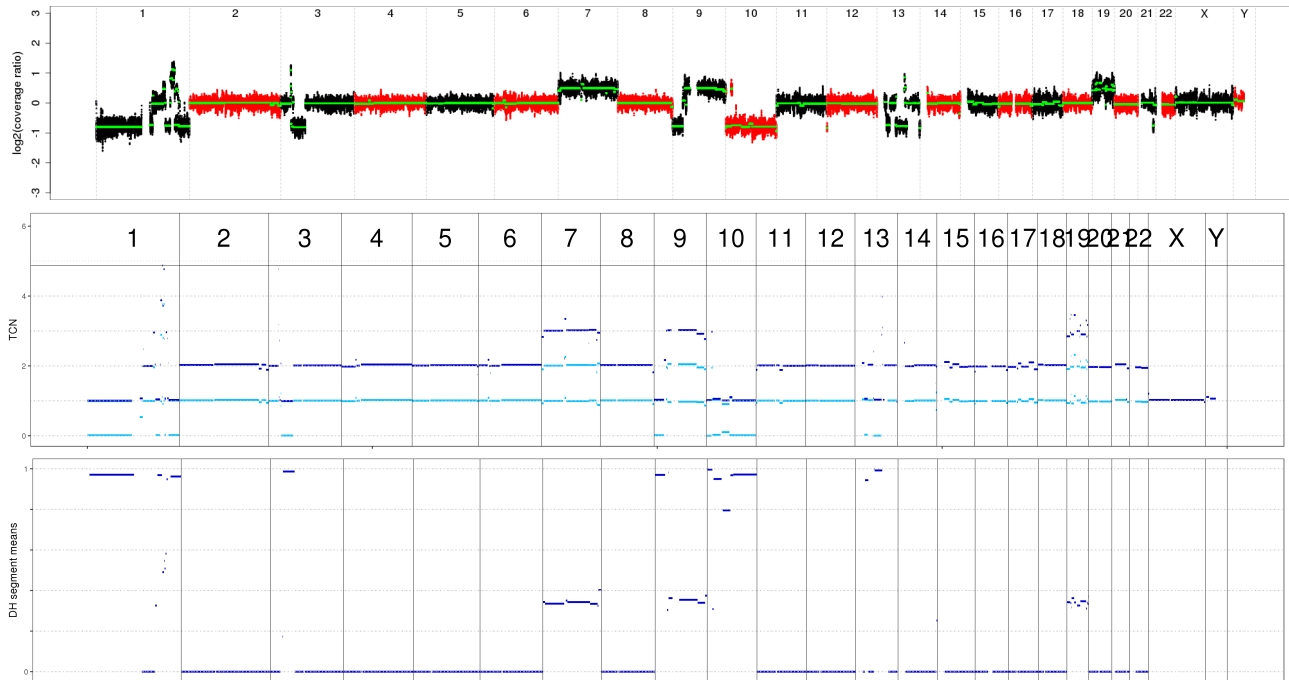

### Chord\_06

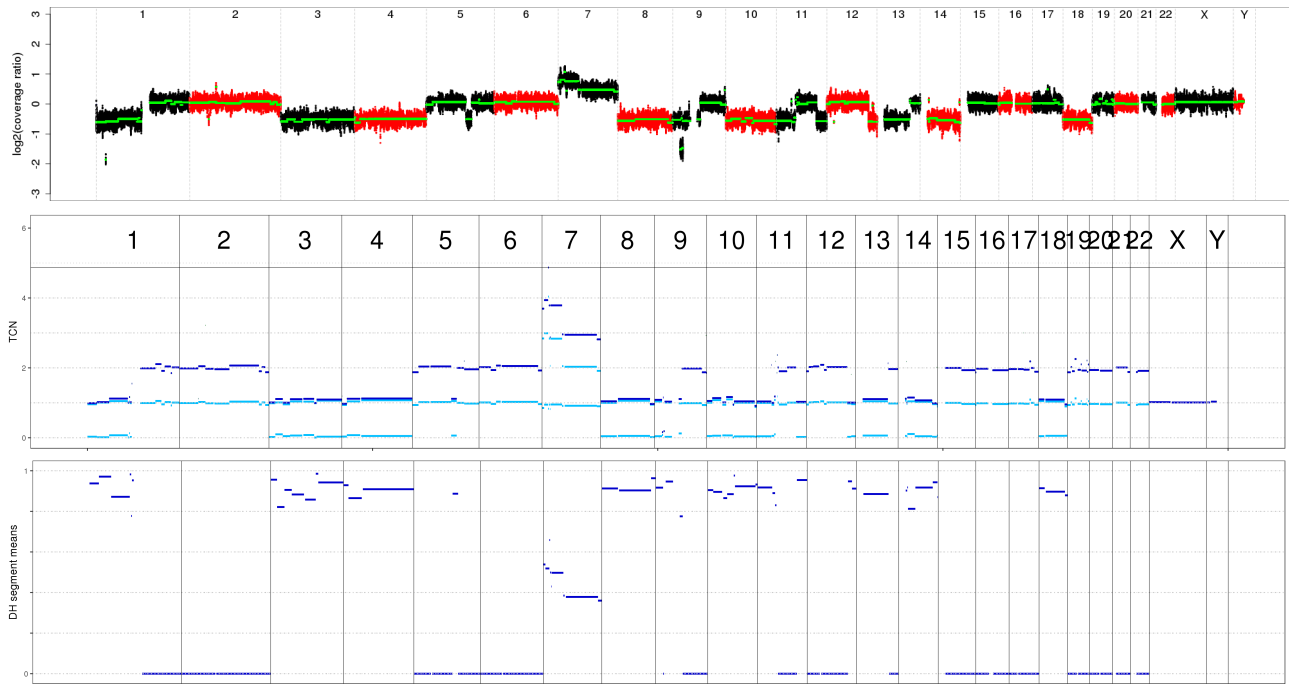

### Chord\_07

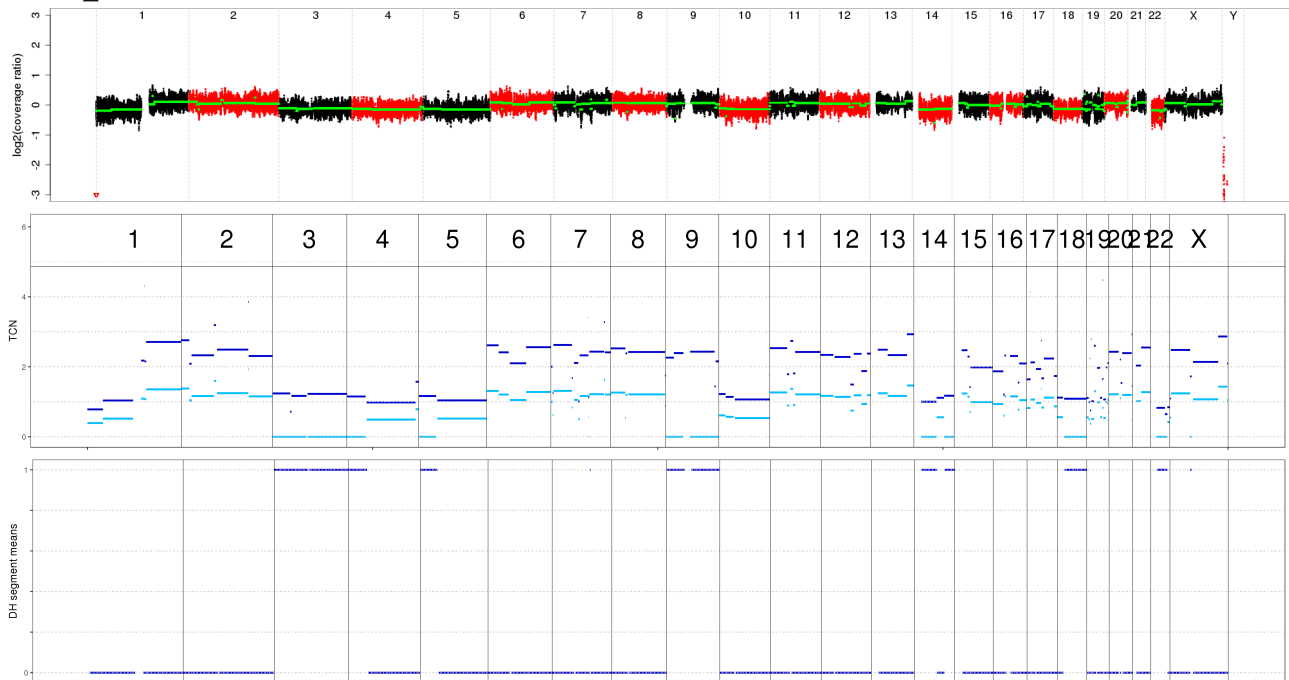

### Chord\_08

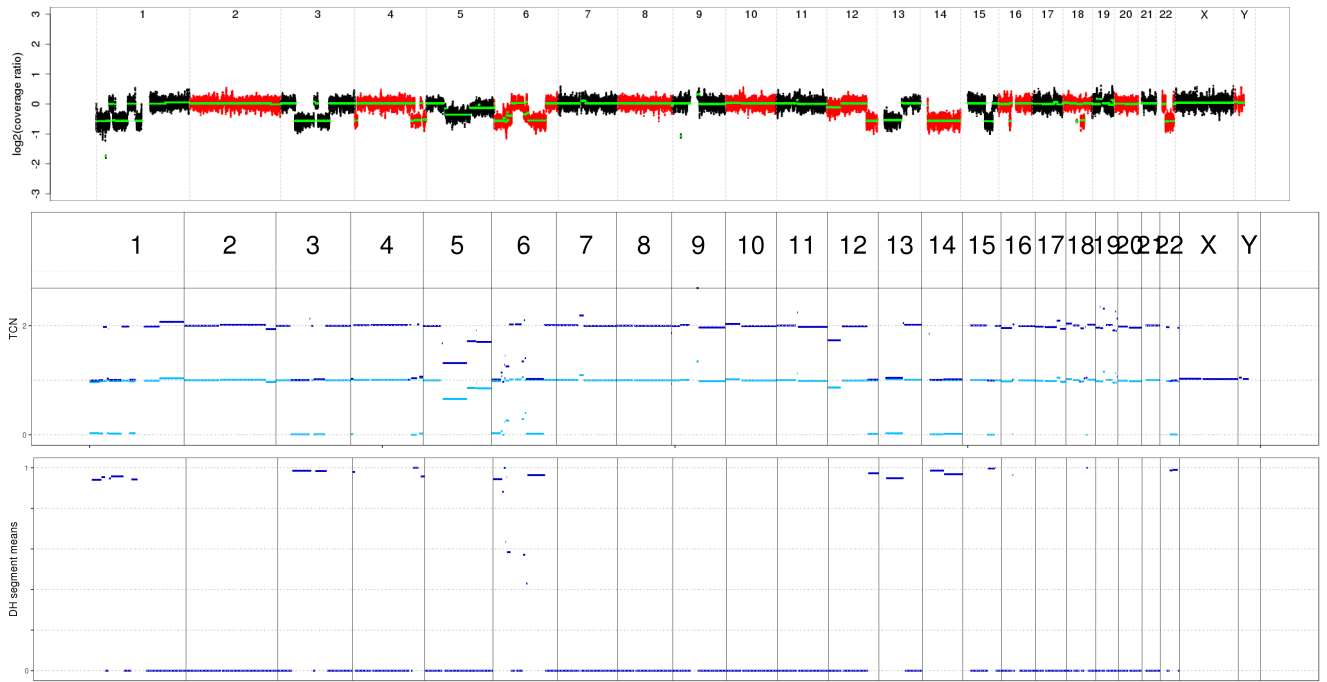

### Chord\_09

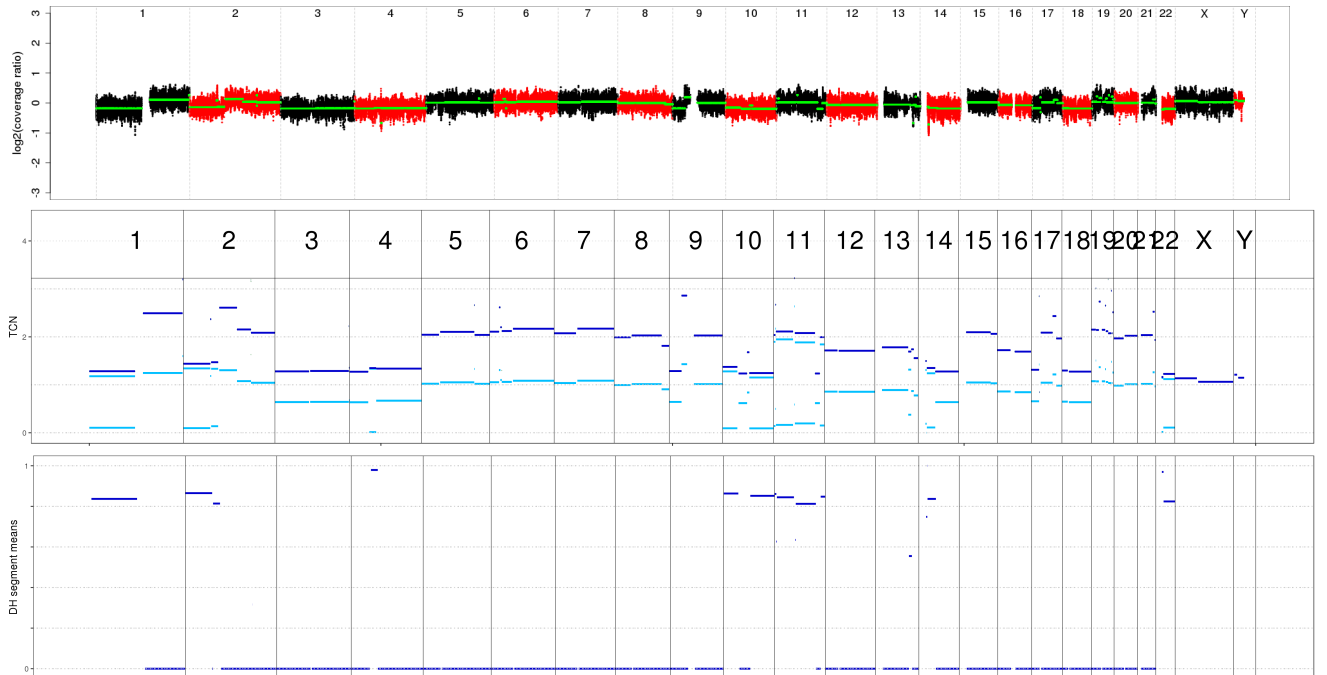

**Supplementary Fig. 1** Copy number plots and CNA profiles of patients Chord\_01, Chord\_02, Chord\_03, Chord\_04, Chord\_06, Chord\_07, Chord\_08, and Chord\_09.

### Chord\_05R

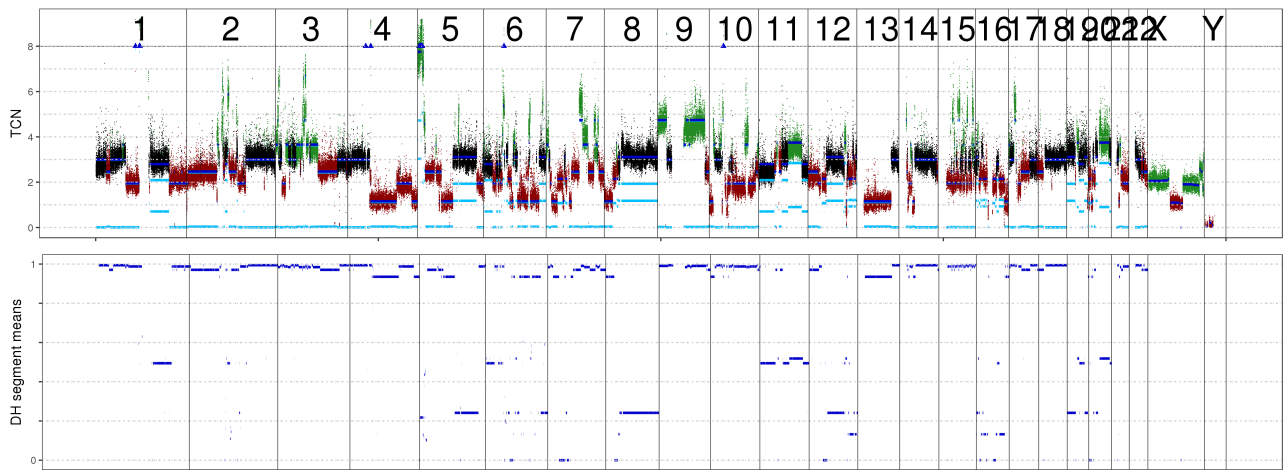

### Chord\_10

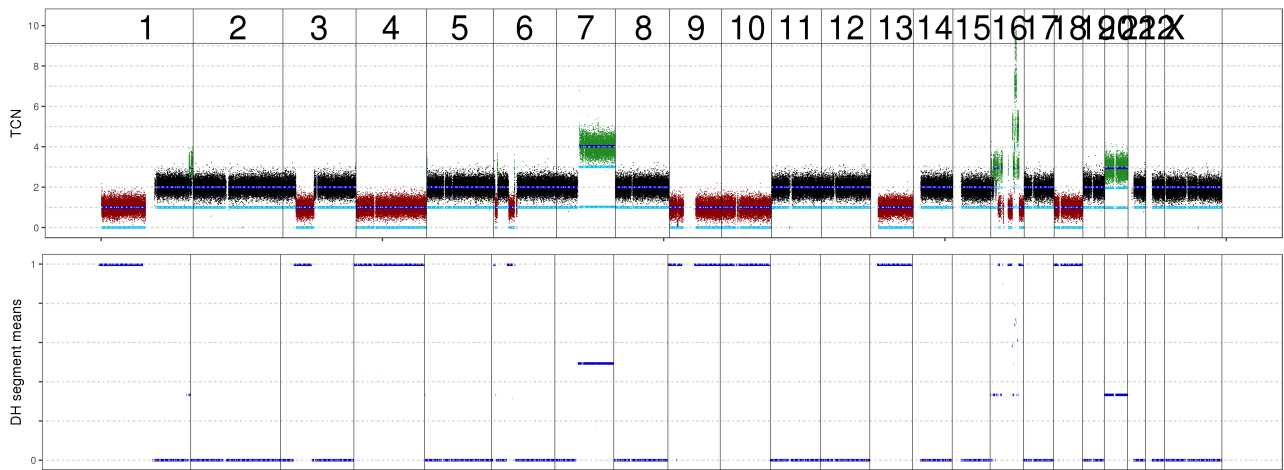

### Chord\_11

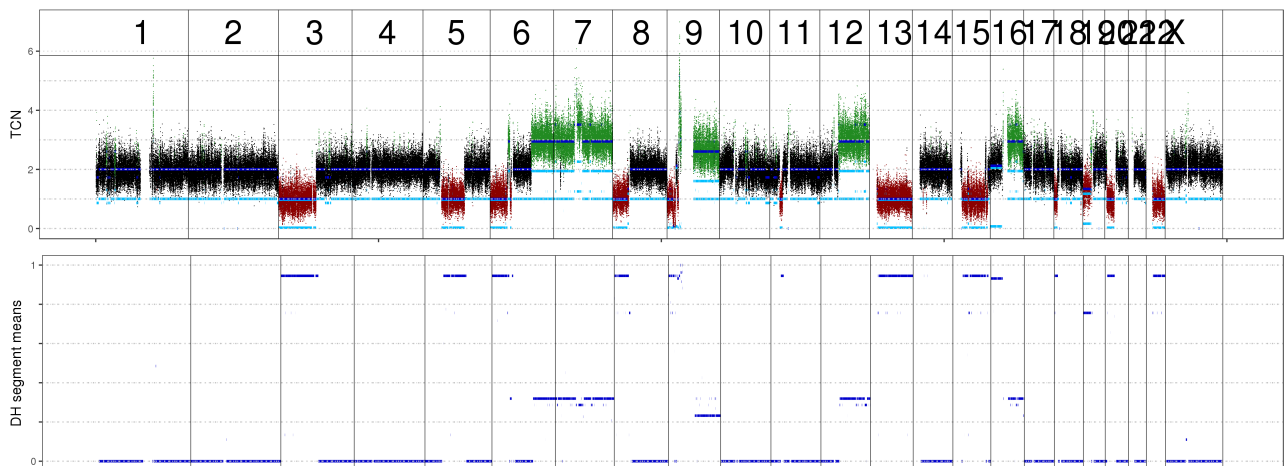

**Supplementary Fig. 2** Copy number and allelic imbalance profiles of patients Chord\_05 (at the time of acquired olaparib resistance), Chord\_10, and Chord\_11.

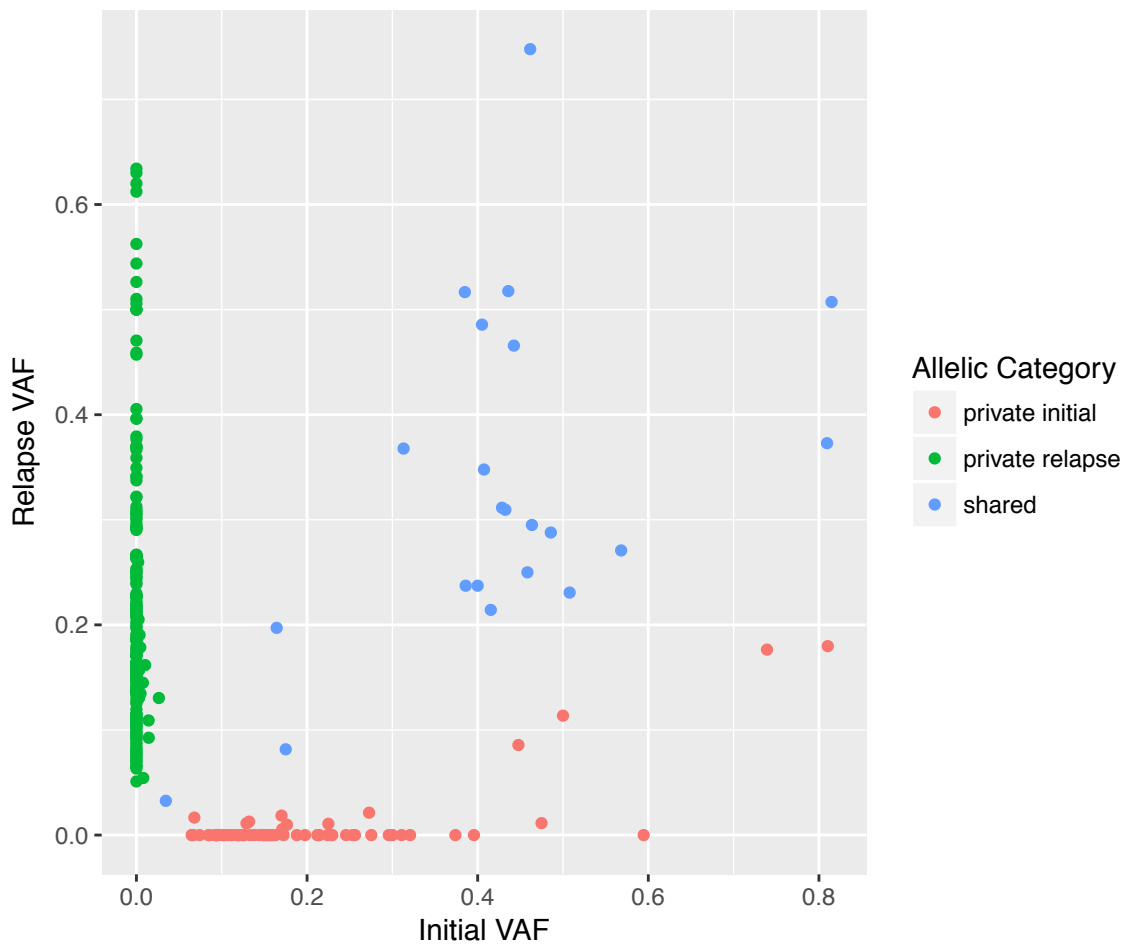

**Supplementary Fig. 3** Variant allele fractions (VAF) of tumor specimens obtained from patient Chord\_05 before (“Initial”) and after (“Relapse”) olaparib treatment. The underlying set of mutations consists of the merged variant calls from these two samples. Mutations were categorized based on their presence before (“private initial”), after (“private relapse”), or before and after (“shared”) olaparib treatment.

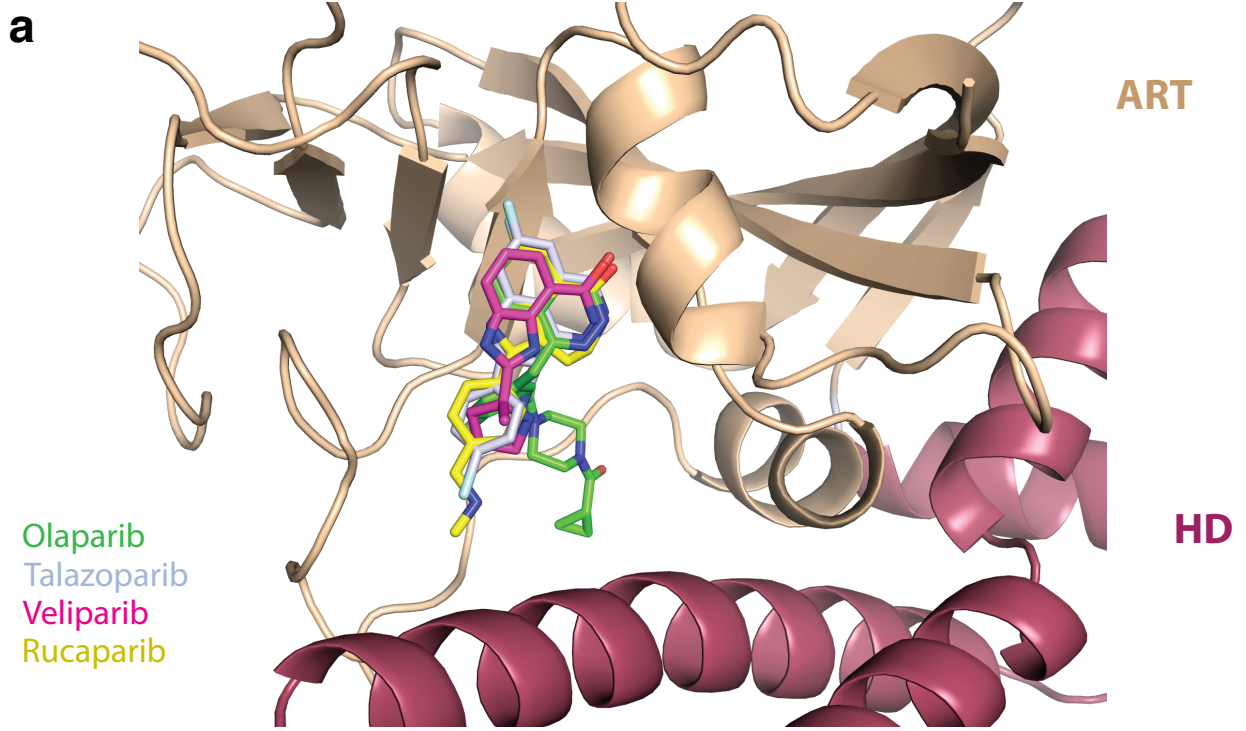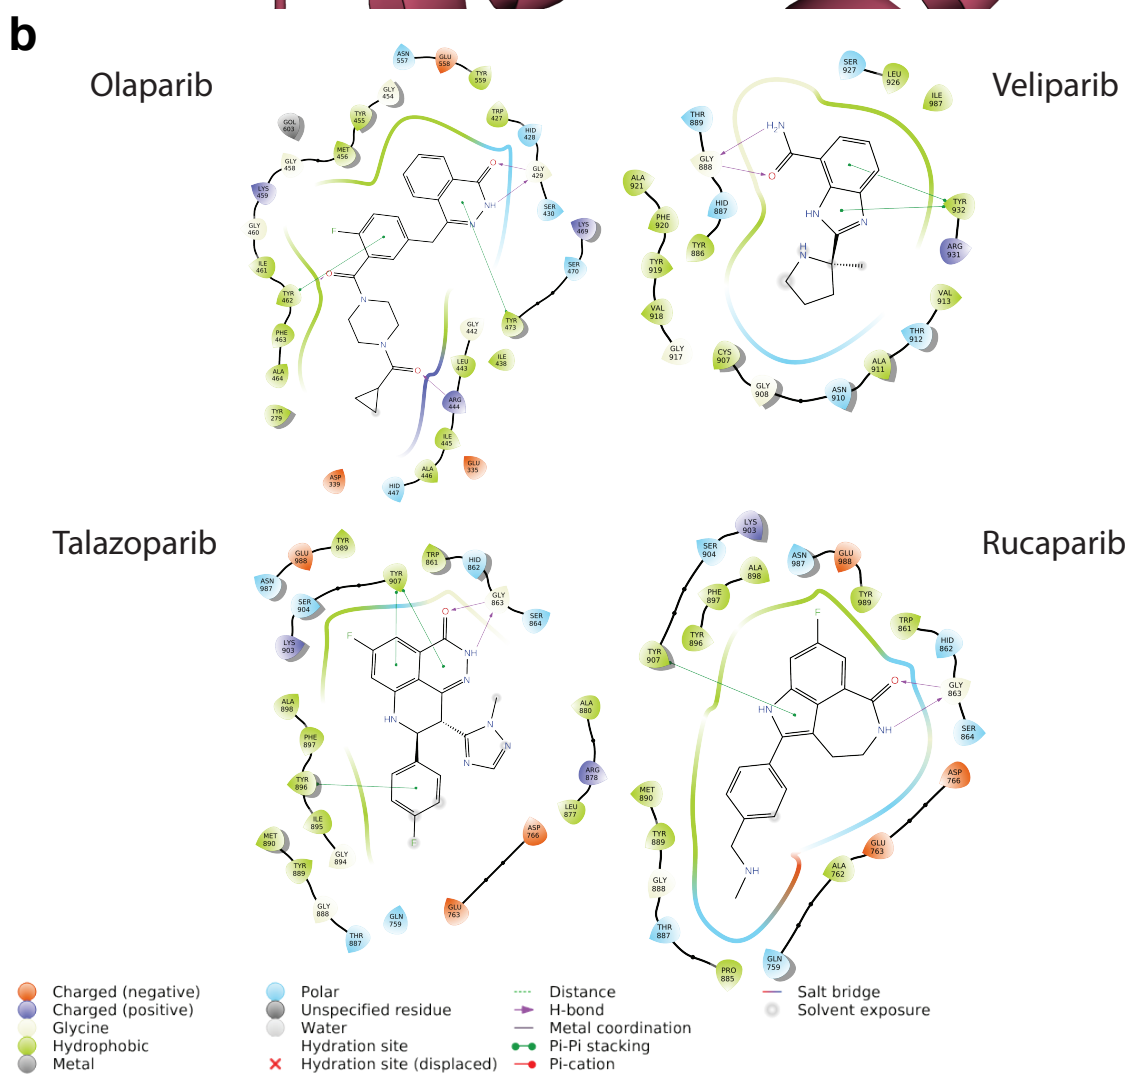



**Supplementary Fig. 4** Structure comparison of four PARP1 inhibitors. **a** Superimposed view of olaparib (green; PDB ID: 4TVJ), talazoparib (blue and white; PDB ID: 4UND), veliparib (fuchsia; PDB ID: 5LX6), and rucaparib (yellow; PDB ID: 4RV6) obtained by structural alignment of the PARP1 catalytic site backbones of the four complex structures. The ART domain (PDB ID: 4UND) and the HD of PARP1 are depicted as wheat and raspberry cartoons, respectively. **b** Two-dimensional ligand interaction plots obtained for the four inhibitors using the Ligand Interaction Diagram function in Maestro (Schrödinger Release 2018-1: Maestro, Schrödinger, LLC, New York, NY, 2018).

## Supplementary Tables

**Supplementary Table 1** Patient characteristics and previous treatments

| Sample   | Age | Sex    | Primary tumor site | Metastases                             | Previous treatment                                                                    | Sequencing type |
|----------|-----|--------|--------------------|----------------------------------------|---------------------------------------------------------------------------------------|-----------------|
| Chord_01 | 55  | female | cervical           | none                                   | IMRT (70 Gy), surgery                                                                 | WES             |
| Chord_02 | 28  | male   | skull base         | none                                   | surgery, HIT (60.1 Gy)                                                                | WES             |
| Chord_03 | 29  | male   | skull base         | pulmonary, cerebellar (per continuity) | surgery, RT (45 Gy), imatinib                                                         | WES             |
| Chord_04 | 55  | male   | cervical           | none                                   | surgery, RT (60 Gy)                                                                   | WES             |
| Chord_05 | 58  | male   | sacrum             | none                                   | PT (60 and 71.6 Gy), imatinib                                                         | WES             |
| Chord_06 | 62  | male   | sacrum             | lymphatic, bone, pulmonary             | PT (74 Gy), surgery, RT (32 Gy), imatinib, sirolimus                                  | WES             |
| Chord_07 | 36  | female | cervical           | none                                   | surgery, HIT (66 Gy), doxorubicin/ifosfamide                                          | WES             |
| Chord_08 | 40  | male   | cervical           | none                                   | surgery, RT (66 Gy)                                                                   | WES             |
| Chord_09 | 47  | male   | lumbar             | pulmonary                              | surgery, RT (70 Gy), surgery, HIT (51 Gy), surgery                                    | WES             |
| Chord_10 | 72  | female | sacrum             | none                                   | surgery, HIT (60 Gy), imatinib, sunitinib, imatinib/everolimus, erlotinib/bevacizumab | WGS             |
| Chord_11 | 67  | female | skull base         | none                                   | surgery, HIT (51 Gy), imatinib                                                        | WGS             |

IMRT, intensity-modulated radiotherapy; Gy, Gray; HIT, heavy ion therapy; RT, radiotherapy; PT, proton therapy

**Supplementary Table 2** Sequencing coverages and additional quality parameters for WES samples

| Sample   | On-target ratio | Average sequencing coverage | Target capture (Agilent SureSelect) | Proper paired |
|----------|-----------------|-----------------------------|-------------------------------------|---------------|
| Chord_01 | 74.21%          | 154.81                      | V5 without UTRs                     | 99.22%        |
| Chord_02 | 74.28%          | 163.76                      | V5 without UTRs                     | 99.34%        |
| Chord_03 | 63.82%          | 105.05                      | V5 with UTRs                        | 98.51%        |
| Chord_04 | 72.25%          | 119.47                      | V5 without UTRs                     | 99.42%        |
| Chord_05 | 75.07%          | 146.67                      | V5 with UTRs                        | 98.69%        |
| Chord_06 | 72.78%          | 111.10                      | V5 with UTRs                        | 98.86%        |
| Chord_07 | 75.38%          | 142.84                      | V5 with UTRs                        | 99.96%        |
| Chord_08 | 80.80%          | 198.17                      | V5 without UTRs                     | 99.34%        |
| Chord_09 | 76.33%          | 156.75                      | V5 with UTRs                        | 99.12%        |

UTRs, untranslated regions

**Supplementary Table 3** Sequencing coverages and additional quality parameters for WGS samples

| Sample    | Average sequencing coverage | Proper paired |
|-----------|-----------------------------|---------------|
| Chord_05R | 73.72                       | 96.46%        |
| Chord_10  | 76.09                       | 96.24%        |
| Chord_11  | 62.72                       | 96.73%        |

**Supplementary Table 4** Candidate HR genes and selected references

| Gene              | PubMed Identifier                                |
|-------------------|--------------------------------------------------|
| <i>ATM</i>        | 26510020                                         |
| <i>BRCA1/2</i>    | 26510020                                         |
| <i>CHEK2</i>      | 26510020                                         |
| <i>ERCC3</i>      | 26510020                                         |
| <i>FANCA</i>      | 26510020                                         |
| <i>HDAC2</i>      | 26510020                                         |
| <i>MLH3</i>       | 26510020                                         |
| <i>MRE11</i>      | 26510020                                         |
| <i>NBN</i>        | 26510020                                         |
| <i>PALB2</i>      | 26510020                                         |
| <i>RAD51</i>      | 26510020                                         |
| <i>ATR</i>        | 25965342, 27708213                               |
| <i>ERCC6</i>      | 25634215, 27374179                               |
| <i>FANCC/D2/G</i> | 25609062, 28993682                               |
| <i>PTEN</i>       | 20049735, 20944090, 21468130, 23239809, 24625059 |
| <i>RAD18</i>      | 25417706, 26056084                               |
| <i>RAD51B</i>     | 23239809, 24278037, 29465803                     |
| <i>RAD54L</i>     | 16912188, 26056084, 26669450, 28223274           |
| <i>RPA1</i>       | 16912188, 23239809                               |
| <i>XRCC3</i>      | 17114795, 23512992, 23760496, 25028150, 29465803 |

**Supplementary Table 5** Energy calculations for the *PARP1* p.T910A mutant

| Domain    | Total ddG |
|-----------|-----------|
| ART_LR    | 0.233     |
| ART_HR    | 0.197     |
| ART_HD_LR | 1.865     |
| ART_HD_HR | 0.514     |

LR, Rosetta ddG\_monomer protocol in low-resolution mode; HR, Rosetta ddG\_monomer protocol in high-resolution mode; ART, constitutively active PARP1 structure (PDB ID: 5DS3); ART\_HD, region corresponding to the ART domain and the HD (amino acids 662-1,011) of the PARP1-DNA complex structure (PDB ID: 4DQY)
